# Supplementary material
Source: Springer Nature journal article supplement (https://www.springermedizin.de/resource/supplementary/12936_2010_1620_MOESM1_ESM.pdf/9542166)

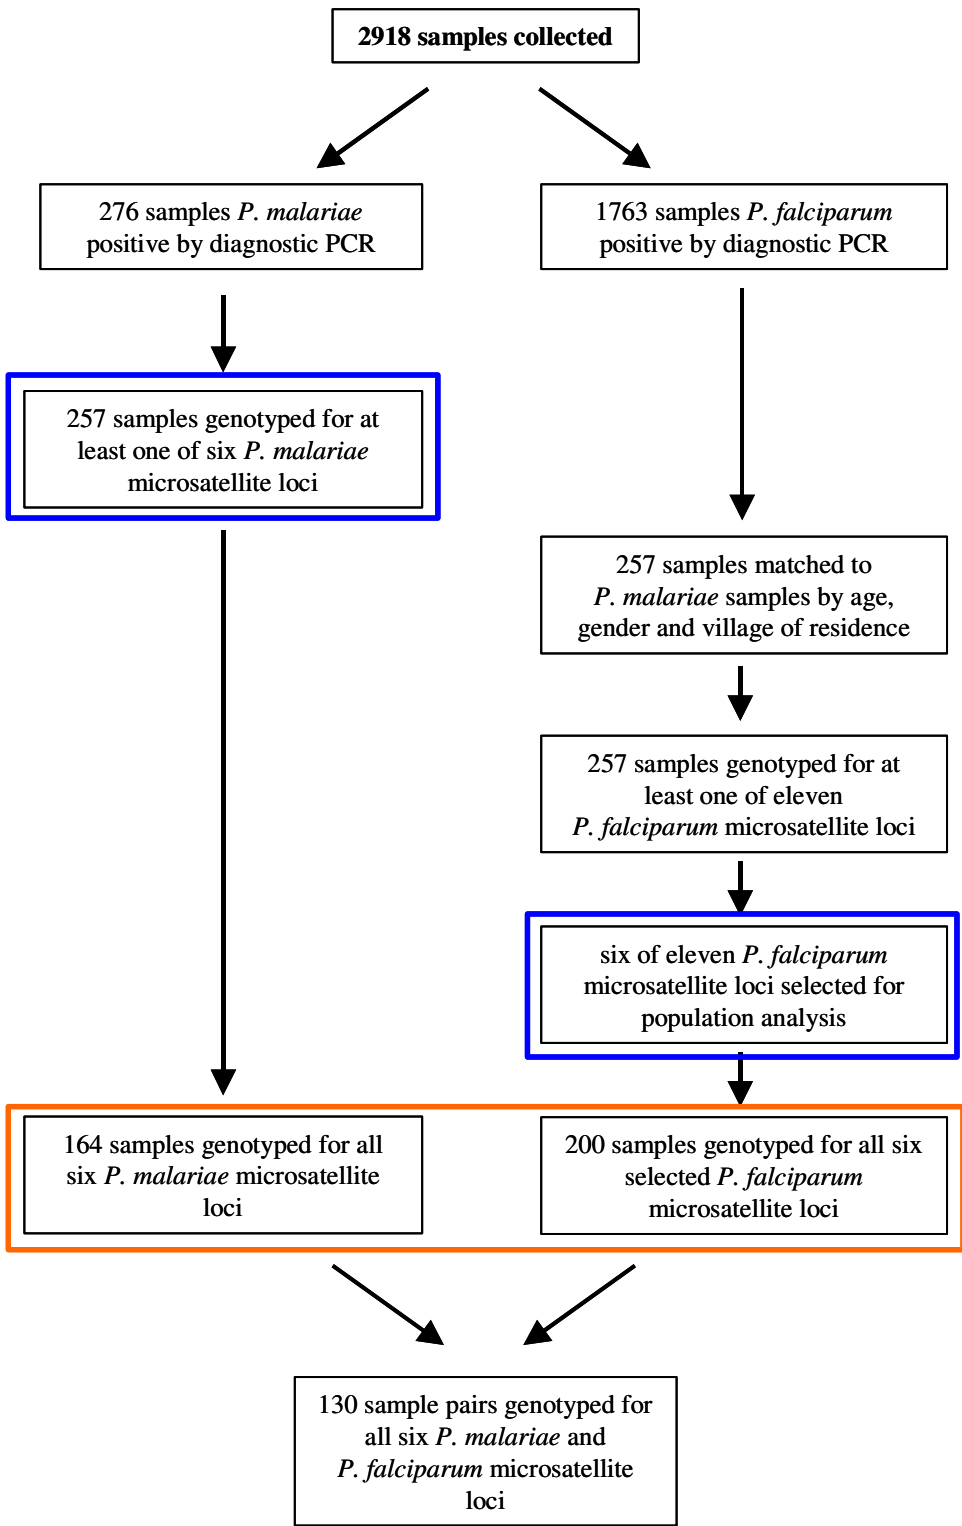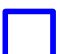

Full data set

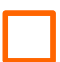

Restricted data set

Supplement: MOESM1 [file 9542166]
